# Supplementary material
Source: PubMed Central journal article supplement (PMC5038262)
Supplement: AAC.00872-16_zac010165599so1.pdf [file AAC.00872-16_zac010165599so1.pdf]

Supplementary figures.

**A**

**Proteins upregulated by THL treatment**

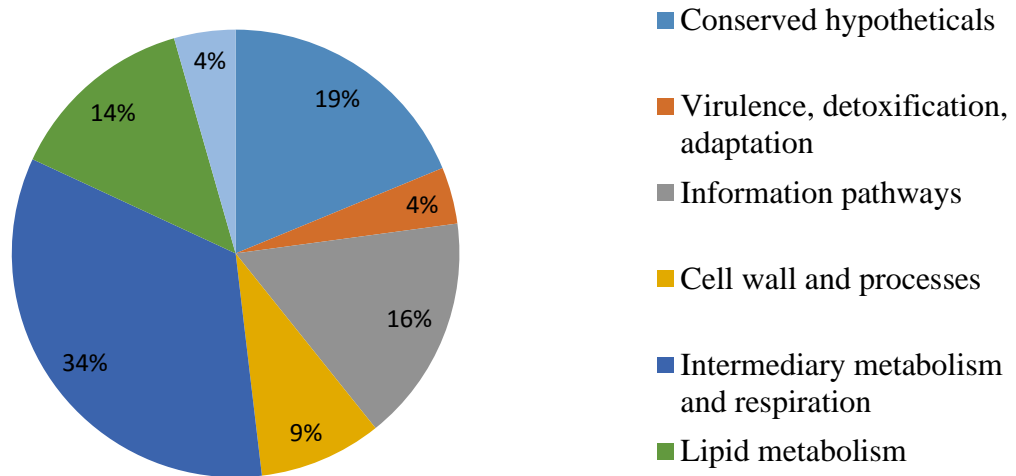

**B**

**Proteins downregulated by simvastatin treatment**

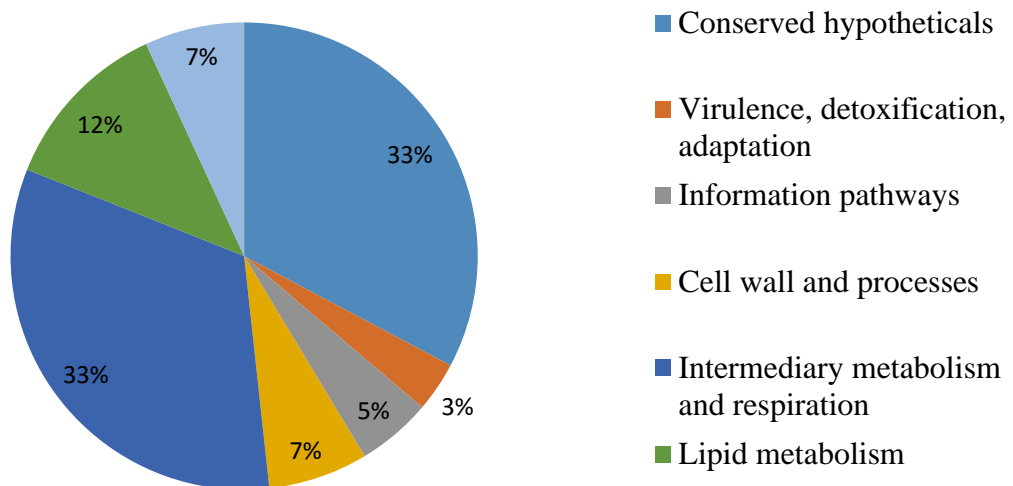

FIG S1 Pie charts representing the percentage, by functional category, of (A) upregulated proteins after 24h THL treatment and (B) downregulated proteins after 24h simvastatin treatment.

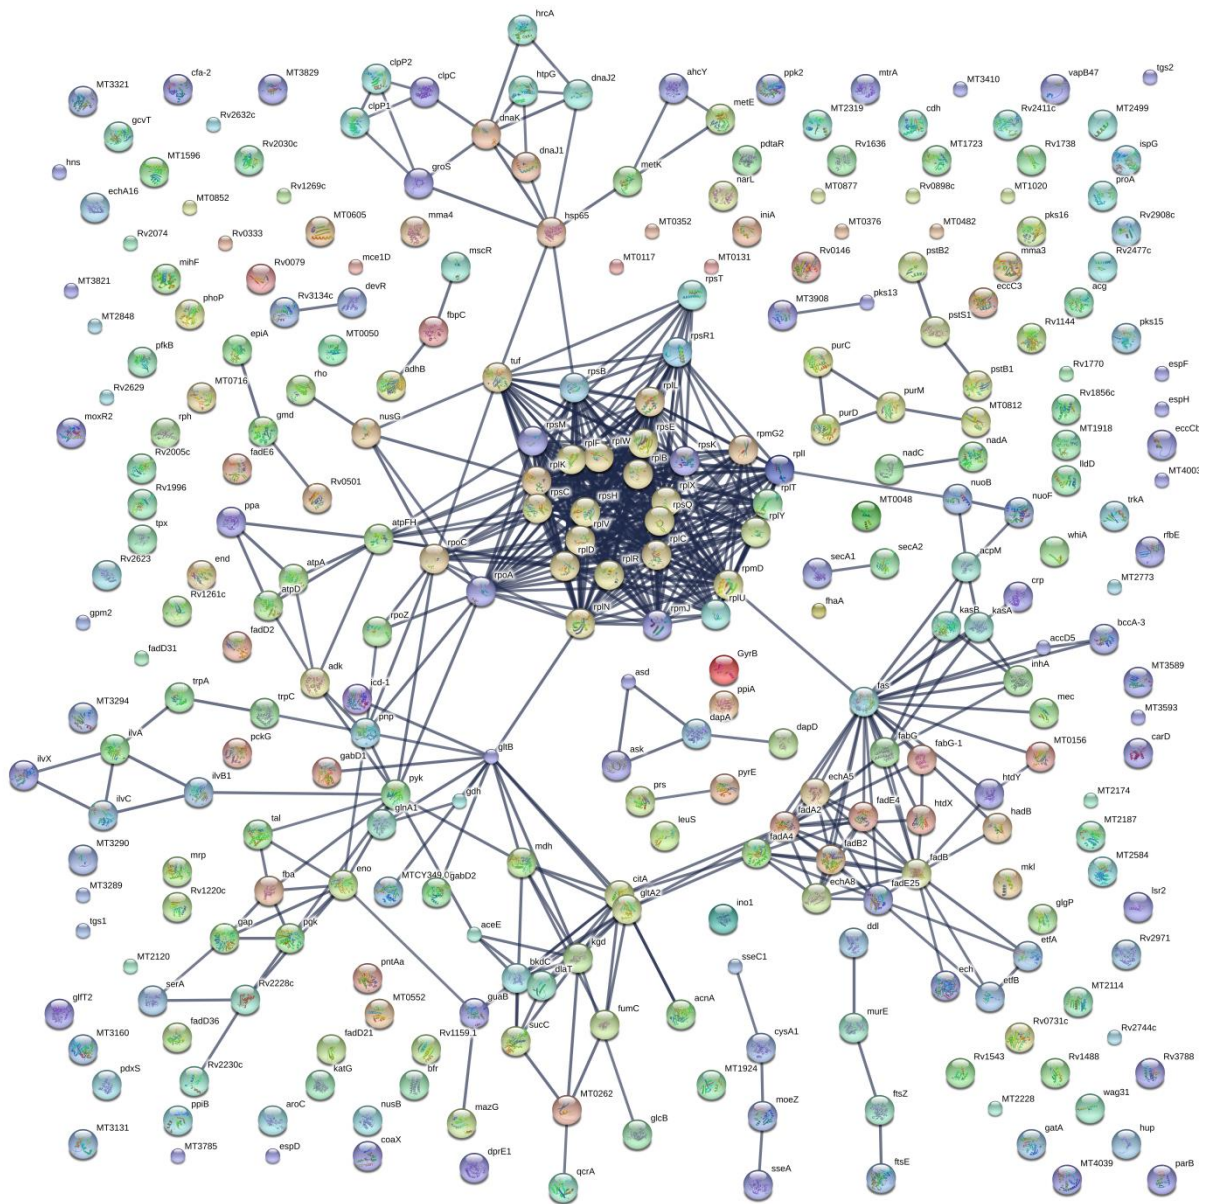

FIG S2 Visualization of network interactions between the 293 up-expressed proteins after 24 h of THL treatment using the STRING database. The figure shows the confidence view and stronger associations, represented by thicker lines. The expected number of edges and the PPI enrichment p-value were 372 and 0, respectively.

TABLE S3

**Proteins down- and upexpressed after a 24 h THL treatment**

| ORF                                            | Gene name    | Gene product                                                 | Fold change | p-values |
|------------------------------------------------|--------------|--------------------------------------------------------------|-------------|----------|
| <i>Intermediary metabolism and respiration</i> |              |                                                              |             |          |
| Rv0560c                                        |              | POSSIBLE BENZOQUINONE METHYLTRANSFERASE                      | 0,02        | 0,02442  |
| Rv0391                                         | <i>metZ</i>  | PROBABLE O-SUCCINYLMHOMOSERINE SULFHYDRYLASE METZ            | 0,05        | 0,00356  |
| Rv0077c                                        |              | PROBABLE OXIDOREDUCTASE                                      | 0,08        | 8,6E-06  |
| Rv2858c                                        | <i>aldC</i>  | PROBABLE ALDEHYDE DEHYDROGENASE ALDC                         | 0,30        | 0,0375   |
| Rv2439c                                        | <i>proB</i>  | PROBABLE GLUTAMATE 5-KINASE PROTEIN PROB                     | 0,36        | 0,03823  |
| Rv3045                                         | <i>adhC</i>  | PROBABLE NADP-DEPENDENT ALCOHOL DEHYDROGENASE ADHC           | 0,58        | 0,02343  |
| Rv1872c                                        | <i>lldD</i>  | LACTATE DEHYDROGENASE                                        | 1,26        | 0,02197  |
| Rv1869c                                        |              | PROBABLE REDUCTASE                                           | 1,31        | 0,02624  |
| RVV2540c                                       | <i>aroC</i>  | CHORISMATE SYNTHASE                                          | 1,32        | 0,01583  |
| Rv3117                                         | <i>cysA3</i> | SULFURTRANSFERASE                                            | 1,38        | 0,03463  |
| Rv3248c                                        | <i>ahcY</i>  | ADENOSYL HOMOCYSTEINASE                                      | 1,43        | 0,04992  |
| Rv0889                                         | <i>citA</i>  | CITRATE SYNTHASE 2                                           | 1,44        | 0,02274  |
| Rv1596                                         | <i>nadC</i>  | NICOTINATE NUCLEOTIDE PYROPHOSPHORYLASE                      | 1,45        | 0,00622  |
| Rv1144                                         |              | 3 HYDROXY 2 METHYLBUTYRYL COA DEHYDROGENASE                  | 1,46        | 0,01005  |
| Rv2215                                         | <i>dlaT</i>  | DIHYDROLIPOAMINE ACETYLTRANSFERASE                           | 1,46        | 0,00808  |
| Rv0809                                         | <i>purM</i>  | PROBABLE PHOSPHORIBOSYLFORMYLGLYCINAMIDINE CYCLO-LIGASE PURM | 1,54        | 0,02994  |
| Rv0148                                         |              | PROBABLE SHORT-CHAIN TYPE DEHYDROGENASE/REDUCTASE            | 1,56        | 0,00444  |
| Rv0241c                                        | <i>htdX</i>  | DOUBLE HOTDOG HYDRATASE                                      | 1,56        | 0,02681  |
| Rv1617                                         | <i>pykA</i>  | PROBABLE PYRUVATE KINASE PYKA                                | 1,56        | 0,02314  |
| Rv0951                                         | <i>sucC</i>  | PROBABLE SUCCINYL-CoA SYNTHETASE SUCC                        | 1,56        | 0,02235  |
| Rv3283                                         | <i>sseA</i>  | PROBABLE THIOSULFATE SULFURTRANSFERASE SSEA                  | 1,58        | 0,00826  |
| Rv1307                                         | <i>atpH</i>  | PROBABLE ATP SYNTHASE DELTA CHAIN ATPH                       | 1,59        | 0,02304  |
| Rv2509                                         |              | PROBABLE SHORT-CHAIN TYPE DEHYDROGENASE/REDUCTASE            | 1,60        | 0,02337  |
| Rv1511                                         | <i>gmdA</i>  | GDP-D-MANNOSE DEHYDRATASE GMDA                               | 1,60        | 0,02323  |
| Rv2476c                                        | <i>gdh</i>   | PROBABLE NAD-DEPENDENT GLUTAMATE DEHYDROGENASE GDH           | 1,61        | 0,01706  |
| Rv1731                                         | <i>gabD2</i> | POSSIBLE SUCCINATE-SEMIALDEHYDE DEHYDROGENASE GABD2          | 1,61        | 0,00171  |

|         |              |                                                                                            |      |         |
|---------|--------------|--------------------------------------------------------------------------------------------|------|---------|
| Rv3150  | <i>nuoF</i>  | PROBABLE NADH DEHYDROGENASE I (CHAIN F)<br>NUOF                                            | 1,61 | 0,03915 |
| Rv0780  | <i>purC</i>  | PHOSPHORIBOSYLAMINOIMIDAZOLE-<br>SUCCINOCARBOXAMIDE SYNTHASE PURC                          | 1,62 | 0,02278 |
| Rv0211  | <i>pckA</i>  | PROBABLE IRON-REGULATED<br>PHOSPHOENOLPYRUVATE CARBOXYKINASE<br>PCKA                       | 1,63 | 0,00548 |
| Rv3001c | <i>ilvC</i>  | PROBABLE KETOL-ACID REDUCTOISOMERASE<br>ILVC                                               | 1,63 | 0,00209 |
| Rv2996c | <i>serA1</i> | PROBABLE D-3-PHOSPHOGLYCERATE<br>DEHYDROGENASE SERA1                                       | 1,65 | 0,00141 |
| Rv0248c |              | PROBABLE SUCCINATE DEHYDROGENASE                                                           | 1,65 | 0,04814 |
| Rv2211c | <i>gcvT</i>  | PROBABLE AMINOMETHYLTRANSFERASE GCVT                                                       | 1,66 | 0,00439 |
| Rv0338c |              | PROBABLE IRON-SULFUR-BINDING REDUCTASE                                                     | 1,68 | 0,00752 |
| Rv1098c | <i>fum</i>   | PROBABLE FUMARASE FUM                                                                      | 1,68 | 0,00028 |
| Rv2971  |              | PROBABLE OXIDOREDUCTASE                                                                    | 1,68 | 0,01468 |
| Rv1240  | <i>mdh</i>   | PROBABLE MALATE DEHYDROGENASE MDH                                                          | 1,69 | 0,0104  |
| Rv3028c | <i>fixB</i>  | PROBABLE ELECTRON TRANSFER<br>FLAVOPROTEIN FIXB                                            | 1,70 | 0,02823 |
| Rv1436  | <i>gap</i>   | PROBABLE GLYCERALDEHYDE 3-PHOSPHATE<br>DEHYDROGENASE GAP                                   | 1,71 | 0,01028 |
| Rv1023  | <i>eno</i>   | PROBABLE ENOLASE ENO                                                                       | 1,71 | 0,00744 |
| Rv1310  | <i>atpD</i>  | PROBABLE ATP SYNTHASE BETA CHAIN ATPD                                                      | 1,71 | 0,00264 |
| Rv1248c | <i>kgd</i>   | ALPHA-KETOGLUTARATE DECARBOXYLASE                                                          | 1,72 | 0,02452 |
| Rv1392  | <i>metK</i>  | PROBABLE S-ADENOSYLMETHIONINE<br>SYNTHETASE METK                                           | 1,72 | 0,00567 |
| Rv0066c | <i>icd2</i>  | PROBABLE ISOCITRATE DEHYDROGENASE<br>[NADP] ICD2                                           | 1,73 | 0,02631 |
| Rv1559  | <i>ilvA</i>  | PROBABLE THREONINE DEHYDRATASE ILVA                                                        | 1,73 | 0,00462 |
| Rv0688  |              | PUTATIVE FERREDOXIN REDUCTASE                                                              | 1,74 | 0,00797 |
| Rv3214  | <i>gpm2</i>  | POSSIBLE PHOSPHOGLYCERATE MUTASE GPM2                                                      | 1,74 | 0,01569 |
| Rv1512  | <i>epiA</i>  | PROBABLE NUCLEOTIDE-SUGAR EPIMERASE<br>EPIA                                                | 1,75 | 0,01474 |
| Rv3411c | <i>guaB2</i> | PROBABLE INOSINE-5'-MONOPHOSPHATE<br>DEHYDROGENASE GUAB2                                   | 1,75 | 0,00012 |
| Rv1133c | <i>metE</i>  | PROBABLE5-<br>METHYLTETRAHYDROPTEROYLTRIGLUTAMATE-<br>-HOMOCYSTEINE METHYLTRANSFERASE METE | 1,76 | 0,01419 |
| Rv3206c | <i>moeB1</i> | PROBABLE MOLYBDENUM COFACTOR<br>BIOSYNTHESIS PROTEIN MOEB1                                 | 1,77 | 0,00817 |
| Rv1448c | <i>tal</i>   | PROBABLE TRANSALDOLASE TAL                                                                 | 1,77 | 0,00351 |
| Rv2753c | <i>dapA</i>  | PROBABLE DIHYDRODIPICOLINATE SYNTHASE<br>DAPA                                              | 1,78 | 0,01917 |
| Rv2259  | <i>mscR</i>  | S-NITROSOMYCOTHOL REDUCTASE MSCR                                                           | 1,80 | 0,02769 |
| Rv1017c | <i>prsA</i>  | PROBABLE RIBOSE-PHOSPHATE<br>PYROPHOSPHOKINASE PRSA                                        | 1,81 | 0,00805 |

|         |              |                                                                    |      |         |
|---------|--------------|--------------------------------------------------------------------|------|---------|
| Rv3029c | <i>fixA</i>  | PROBABLE ELECTRON TRANSFER<br>FLAVOPROTEIN FIXA                    | 1,81 | 0,00618 |
| Rv2029c | <i>pfkB</i>  | PROBABLE PHOSPHOFRUCTOKINASE PFKB                                  | 1,85 | 0,03022 |
| Rv1201c |              | PROBABLE TRANSFERASE                                               | 1,86 | 0,01838 |
| Rv3596c | <i>clpC1</i> | PROBABLE ATP-DEPENDENT PROTEASE ATP-<br>BINDING SUBUNIT CLPC1      | 1,86 | 0,0011  |
| Rv0234c | <i>gabD1</i> | SUCCINATE SEMIALDEHYDE DESHYDROGENASE                              | 1,86 | 0,03506 |
| Rv0636  |              | SINGLE HOTDOG HYDRATASE, HOMODIMER                                 | 1,86 | 0,02617 |
| Rv0382c | <i>pyrE</i>  | PROBABLE OROTATE<br>PHOSPHORIBOSYLTRANSFERASE PYRE                 | 1,89 | 0,02032 |
| Rv3224  |              | POSSIBLE IRON-REGULATED SHORT-CHAIN<br>DEHYDROGENASE/REDUCTASE     | 1,90 | 0,00089 |
| Rv3726  |              | POSSIBLE DEHYDROGENASE                                             | 1,91 | 0,04217 |
| Rv2606c | <i>snzP</i>  | POSSIBLE PYRIDOXINE BIOSYNTHESIS PROTEIN<br>SNZP                   | 1,91 | 0,00176 |
| Rv0155  | <i>pntAa</i> | PROBABLE NAD(P) TRANSHYDROGENASE<br>(SUBUNIT ALPHA) PNTAA          | 1,92 | 0,02227 |
| Rv2241  | <i>aceE</i>  | PYRUVATE DESHYDROGENASE E1 COMPONENT                               | 1,92 | 0,00994 |
| Rv3232c | <i>ppk2</i>  | POLYPHOSPHATE KINASE                                               | 1,94 | 0,02743 |
| Rv2220  | <i>glnA1</i> | GLUTAMINE SYNTHETASE GLNA1                                         | 1,95 | 0,00512 |
| Rv2460c | <i>clpP2</i> | PROBABLE ATP-DEPENDENT CLP PROTEASE<br>PROTEOLYTIC SUBUNIT 2 CLPP2 | 1,96 | 0,0055  |
| Rv3708c | <i>asd</i>   | ASPARTATE-SEMIALDEHYDE DEHYDROGENASE<br>ASD                        | 1,97 | 0,00166 |
| Rv3709c | <i>ask</i>   | ASPARTOKINASE ASK                                                  | 1,99 | 0,01958 |
| Rv1328  | <i>glgP</i>  | PROBABLE GLYCOGEN PHOSPHORYLASE GLGP                               | 2,04 | 0,00059 |
| Rv1837c | <i>glcB</i>  | PROBABLE MALATE SYNTHASE G GLCB                                    | 2,05 | 0,02906 |
| Rv1229c | <i>mrp</i>   | SODIUM:POTON ANTIporter                                            | 2,06 | 0,00265 |
| Rv0733  | <i>adk</i>   | PROBABLE ADENYLATE KINASE ADK                                      | 2,08 | 0,02456 |
| Rv0363c | <i>fba</i>   | PROBABLE FRUCTOSE-BISPHOSPHATE<br>ALDOLASE FBA                     | 2,11 | 0,0021  |
| Rv1475c | <i>acnA</i>  | PROBABLE IRON-REGULATED ACONITATE<br>HYDRATASE ACN                 | 2,11 | 0,01704 |
| Rv3628  | <i>ppa</i>   | INORGANIC PYROPHOSPHATASE PPA                                      | 2,12 | 0,02801 |
| Rv1611  | <i>trpC</i>  | PROBABLE INDOLE-3-GLYCEROL PHOSPHATE<br>SYNTHASE TRPC              | 2,13 | 0,00369 |
| Rv1613  | <i>trpA</i>  | PROBABLE TRYPTOPHAN SYNTHASE, ALPHA<br>SUBUNIT TRPA                | 2,14 | 0,04889 |
| Rv2195  | <i>qcrA</i>  | PROBABLE RIESKE IRON-SULFUR PROTEIN QCRA                           | 2,15 | 0,002   |
| Rv2129c |              | PROBABLE OXYDREDUCTASE                                             | 2,16 | 0,02013 |
| Rv2461c | <i>clpP1</i> | PROBABLE ATP-DEPENDENT CLP PROTEASE<br>PROTEOLYTIC SUBUNIT 1 CLPP1 | 2,28 | 0,01072 |
| Rv0044c |              | POSSIBLE OXIDOREDUCTASE                                            | 2,29 | 0,00769 |
| Rv3509c | <i>ilvX</i>  | PROBABLE ACETOHYDROXYACID SYNTHASE<br>ILVX                         | 2,38 | 5,7E-05 |
| Rv0046c | <i>ino1</i>  | MYO-INOSITOL-1-PHOSPHATE SYNTHASE INO1                             | 2,40 | 0,00177 |

|                         |               |                                                                      |      |         |
|-------------------------|---------------|----------------------------------------------------------------------|------|---------|
| Rv3389c                 | <i>htdY</i>   | DOUBLE HOTDOG HYDRATASE                                              | 2,41 | 0,00057 |
| Rv3859c                 | <i>gltB</i>   | PROBABLE FERRODOXIN-DEPENDENT<br>GLUTAMATE SYNTHASE GLTB             | 2,50 | 0,03912 |
| Rv1856c                 |               | POSSIBLE OXIDOREDUCTASE                                              | 2,56 | 0,00161 |
| Rv2427c                 | <i>proA</i>   | PROBABLE GAMMA-GLUTAMYL PHOSPHATE<br>REDUCTASE PROTEIN PROA          | 2,64 | 0,00682 |
| Rv3485c                 |               | PROBABLE SHORT-CHAIN TYPE<br>DEHYDROGENASE/REDUCTASE                 | 2,74 | 0,01823 |
| Rv1437                  | <i>pgk</i>    | PROBABLE PHOSPHOGLYCERATE KINASE PGK                                 | 2,81 | 0,0298  |
| Rv1594                  | <i>nadA</i>   | PROBABLE QUINOLINATE SYNTHETASE NADA                                 | 2,83 | 0,00044 |
| Rv1308                  | <i>atpA</i>   | PROBABLE ATP SYNTHASE ALPHA CHAIN ATPA                               | 2,88 | 0,0336  |
| Rv0761c                 | <i>adhB</i>   | POSSIBLE ZINC-CONTAINING ALCOHOL<br>DEHYDROGENASE NAD DEPENDENT ADHB | 2,95 | 0,00014 |
| Rv3003c                 | <i>ilvB1</i>  | ACETOLACTATE SYNTHASE ilvB1                                          | 3,03 | 0,00222 |
| Rv0501                  | <i>galE2</i>  | POSSIBLE UDP-GLUCOSE 4-EPIMERASE GALE2                               | 3,05 | 0,04452 |
| Rv3146                  | <i>nuoB</i>   | PROBABLE NADH DEHYDROGENASE I (CHAIN B)<br>NUOB                      | 3,10 | 0,03522 |
| Rv1220c                 |               | METHYLTRANSFERASE                                                    | 3,32 | 0,01155 |
| Rv3118                  | <i>sseC1</i>  | CONSERVED HYPOTHETICAL PROTEIN                                       | 3,60 | 0,04349 |
| Rv0896                  | <i>gltA2</i>  | PROBABLE CITRATE SYNTHASE I GLTA2                                    | 3,95 | 0,01594 |
| Rv0772                  | <i>purD</i>   | PROBABLE PHOSPHORIBOSYLAMINE--GLYCINE<br>LIGASE PURD                 | 3,98 | 0,04212 |
| Rv1876                  | <i>bfrA</i>   | PROBABLE BACTERIOFERRITIN BFRA                                       | 4,48 | 0,00319 |
| Rv1334                  | <i>mec</i>    | POSSIBLE HYDROLASE                                                   | 4,68 | 0,00618 |
| <i>Lipid metabolism</i> |               |                                                                      |      |         |
| Rv0860                  | <i>fadB</i>   | 3 HYDROXYL COA DEHYDROGENASE                                         | 1,24 | 0,04974 |
| Rv0731c                 |               | S-ADENOSYL-L-METHIONINE-DEPENDANT<br>METHYLTRANSFERASE               | 1,43 | 0,04865 |
| Rv0146                  |               | S-ADENOSYL-L-METHIONINE-DEPENDANT<br>METHYLTRANSFERASE               | 1,47 | 0,01735 |
| Rv1683                  |               | ACYL COA SYNTHETASE                                                  | 1,47 | 0,00035 |
| Rv0270                  | <i>fadD2</i>  | PROBABLE FATTY-ACID-CoA LIGASE FADD2                                 | 1,52 | 0,04728 |
| Rv0675                  | <i>echA5</i>  | PROBABLE ENOYL-CoA HYDRATASE ECHA5                                   | 1,55 | 0,00526 |
| Rv0243                  | <i>fadA2</i>  | PROBABLE ACETYL-CoA ACYLTRANSFERASE<br>FADA2                         | 1,60 | 0,01241 |
| Rv3774                  | <i>echA21</i> | POSSIBLE ENOYL-CoA HYDRATASE ECHA21                                  | 1,65 | 0,0218  |
| Rv1925                  | <i>fadD31</i> | PROBABLE ACYL-CoA LIGASE FADD31                                      | 1,67 | 7,2E-05 |
| Rv2524c                 | <i>fas</i>    | PROBABLE FATTY ACID SYNTHASE FAS                                     | 1,68 | 0,01709 |
| Rv3274c                 | <i>fadE25</i> | PROBABLE ACYL-CoA DEHYDROGENASE FADE25                               | 1,72 | 0,01243 |
| Rv0242c                 | <i>fabG4</i>  | PROBABLE 3-OXOACYL-[ACYL-CARRIER<br>PROTEIN] REDUCTASE FABG4         | 1,73 | 0,00288 |
| Rv1544                  |               | POSSIBLE KETOACYL REDUCTASE                                          | 1,74 | 0,00017 |
| Rv0271c                 | <i>fadE6</i>  | PROBABLE ACYL-CoA DEHYDROGENASE FADE6                                | 1,79 | 0,01564 |
| Rv1484                  | <i>inhA</i>   | NADH-DEPENDENT ENOYL-[ACYL-CARRIER-<br>PROTEIN] REDUCTASE INHA       | 1,79 | 0,00026 |

|         |               |                                                                              |      |         |
|---------|---------------|------------------------------------------------------------------------------|------|---------|
| Rv3801c | <i>fadD32</i> | FATTY ACID COA LIGASE                                                        | 1,79 | 0,00044 |
| Rv2831  | <i>echA16</i> | PROBABLE ENOYL-CoA HYDRATASE ECHA16                                          | 1,80 | 0,02105 |
| Rv3800c | <i>pks13</i>  | POLYKETIDE SYNTHASE PKS13                                                    | 1,81 | 0,00024 |
| Rv3280  | <i>accD5</i>  | PROBABLE PROPIONYL-CoA CARBOXYLASE BETA CHAIN 5 ACCD5                        | 1,82 | 0,00201 |
| Rv0468  | <i>fadB2</i>  | PROBABLE 3-HYDROXYBUTYRYL-CoA DEHYDROGENASE FADB2                            | 2,00 | 0,00813 |
| Rv2246  | <i>kasB</i>   | 3-OXOACYL-ACP SYNTHASE                                                       | 2,01 | 0,00016 |
| Rv0129c | <i>fbpC</i>   | SECRETED ANTIGEN 85-C FBPC                                                   | 2,03 | 0,00992 |
| Rv1483  | <i>fabG1</i>  | 3-OXOACYL-[ACYL-CARRIER PROTEIN] REDUCTASE FABG1                             | 2,05 | 0,03438 |
| Rv2245  | <i>kasA</i>   | 3-OXOACYL-[ACYL-CARRIER PROTEIN] SYNTHASE 1 KASA                             | 2,05 | 0,02594 |
| Rv3285  | <i>accA3</i>  | PROBABLE BIFUNCTIONAL PROTEIN ACETYL-/PROPIONYL-COENZYME A CARBOXYLASE accA3 | 2,08 | 0,00046 |
| Rv0642c | <i>mmaA4</i>  | METHOXY MYCOLIC ACID SYNTHASE 4 MMAA4                                        | 2,13 | 0,03725 |
| Rv1323  | <i>fadA4</i>  | ACETYL COA ACETYLTRANSFERASE                                                 | 2,19 | 0,00695 |
| Rv2244  | <i>acpM</i>   | MEROMYCOLATE EXTENSION ACYL CARRIER PROTEIN ACPM                             | 2,23 | 0,00133 |
| Rv1193  | <i>fadD36</i> | PROBABLE FATTY-ACID-CoA LIGASE FADD36                                        | 2,30 | 0,01604 |
| Rv1013  | <i>pks16</i>  | PUTATIVE POLYKETIDE SYNTHASE PKS16                                           | 2,49 | 0,01062 |
| Rv1070c | <i>echA8</i>  | ENOYL-COA HYDRATASE ECHA8                                                    | 2,64 | 0,0461  |
| Rv1185c | <i>fadD21</i> | PROBABLE FATTY-ACID--CoA LIGASE FADD21                                       | 2,72 | 0,04212 |
| Rv2289  | <i>cdh</i>    | PROBABLE CDP-DIACYLGLYCEROL PYROPHOSPHATASE CDH                              | 2,75 | 0,02922 |
| Rv3720  |               | POSSIBLE FATTY ACID SYNTHASE                                                 | 2,77 | 0,0339  |
| Rv1543  |               | POSSIBLE FATTY ACYL-CoA REDUCTASE                                            | 3,17 | 0,05053 |
| Rv2947c | <i>pks15</i>  | PROBABLE POLYKETIDE SYNTHASE PKS15                                           | 3,24 | 0,00153 |
| Rv2982c | <i>gpdA2</i>  | PROBABLE GLYCEROL-3-PHOSPHATE DEHYDROGENASE gpdA2                            | 3,36 | 0,01406 |
| Rv0231  | <i>fadE4</i>  | PROBABLE ACYL-CoA DEHYDROGENASE FADE4                                        | 4,72 | 0,02354 |
| Rv3130c | <i>tgs1</i>   | TRIACYLGLYCEROL SYNTHASE                                                     | 5,36 | 0,0011  |
| Rv0643c | <i>mmaA3</i>  | METHOXY MYCOLIC ACID SYNTHASE 3 MMAA3                                        | 7,63 | 0,01072 |

#### Information pathways

|         |             |                                                                   |      |         |
|---------|-------------|-------------------------------------------------------------------|------|---------|
| Rv1020  | <i>mfd</i>  | PROBABLE TRANSCRIPTION-REPAIR COUPLING FACTOR MFD                 | 0,40 | 0,00282 |
| Rv3852  | <i>hns</i>  | NUCLEOTIDESTRUCTURING PROTEIN HNS                                 | 1,48 | 0,00439 |
| Rv0685  | <i>tuf</i>  | ELONGATION FACTOR TU                                              | 1,49 | 0,0138  |
| Rv0639  | <i>nusG</i> | PROBABLE TRANSCRIPTION ANTITERMINATION PROTEIN NUSG               | 1,52 | 0,02598 |
| Rv2890c | <i>rpsB</i> | PROBABLE 30S RIBOSOMAL PROTEIN S2 RPSB                            | 1,53 | 0,00704 |
| RV2495c | <i>bkdC</i> | PROBABLE BRANCHED-CHAIN KETO ACID DEHYDROGENASE E2 COMPONENT BKDC | 1,56 | 0,00072 |
| Rv2412  | <i>rpsT</i> | PROBABLE 30S RIBOSOMAL PROTEIN S20 RPST                           | 1,60 | 0,01752 |

|         |              |                                                                                                                                                      |      |         |
|---------|--------------|------------------------------------------------------------------------------------------------------------------------------------------------------|------|---------|
| Rv2783c | <i>gpsI</i>  | BIFUNCTIONAL PROTEIN POLYRIBONUCLEOTIDE NUCLEOTIDYLTRANSFERASE GPSI: GUANOSINE PENTAPHOSPHATE SYNTHETASE + POLYRIBONUCLEOTIDE NUCLEOTIDYLTRANSFERASE | 1,60 | 0,04032 |
| Rv1340  | <i>rphA</i>  | PROBABLE RIBONUCLEASE RPHA                                                                                                                           | 1,61 | 0,01368 |
| Rv3457c | <i>rpoA</i>  | PROBABLE DNA-DIRECTED RNA POLYMERASE (ALPHA CHAIN) RPOA                                                                                              | 1,63 | 0,04996 |
| Rv0670  | <i>end</i>   | PROBABLE ENDONUCLEASE IV END                                                                                                                         | 1,64 | 0,02439 |
| Rv2986c | <i>hupB</i>  | PROBABLE DNA-BINDING PROTEIN HU HOMOLOG HUPB                                                                                                         | 1,65 | 0,00631 |
| Rv2533c | <i>nusB</i>  | N UTILIZATION SUBSTANCE PROTEIN NUSB                                                                                                                 | 1,66 | 0,04288 |
| Rv0719  | <i>rplF</i>  | PROBABLE 50S RIBOSOMAL PROTEIN L6 RPLF                                                                                                               | 1,67 | 0,01059 |
| Rv2442c | <i>rplU</i>  | PROBABLE 50S RIBOSOMAL PROTEIN L21 RPLU                                                                                                              | 1,67 | 0,01946 |
| Rv1641  | <i>infC</i>  | PROBABLE INITIATION FACTOR IF-3 INFC                                                                                                                 | 1,71 | 0,02626 |
| Rv0707  | <i>rpsC</i>  | PROBABLE 30S RIBOSOMAL PROTEIN S3 RPSC                                                                                                               | 1,72 | 0,01722 |
| Rv1015c | <i>rplY</i>  | PROBABLE 50S RIBOSOMAL PROTEIN L25 RPLY                                                                                                              | 1,76 | 0,01911 |
| Rv0718  | <i>rpsH</i>  | PROBABLE 30S RIBOSOMAL PROTEIN S8 RPSH                                                                                                               | 1,77 | 0,01502 |
| Rv0009  | <i>ppiA</i>  | PROBABLE IRON-REGULATED PEPTIDYL-PROLYL CIS-TRANS ISOMERASE A PPIA                                                                                   | 1,82 | 0,01293 |
| Rv0056  | <i>rplI</i>  | PROBABLE 50S RIBOSOMAL PROTEIN L9 RPLI                                                                                                               | 1,86 | 0,03289 |
| Rv0704  | <i>rplB</i>  | PROBABLE 50S ribosomal protein L2 RPLB                                                                                                               | 1,89 | 0,02032 |
| Rv0702  | <i>rplD</i>  | PROBABLE 50S RIBOSOMAL PROTEIN L4 RPLD                                                                                                               | 1,89 | 0,00479 |
| Rv1297  | <i>rho</i>   | PROBABLE TRANSCRIPTION TERMINATION FACTOR RHO HOMOLOG                                                                                                | 1,89 | 0,00142 |
| Rv0714  | <i>rplN</i>  | PROBABLE 50S RIBOSOMAL PROTEIN L14 RPLN                                                                                                              | 1,89 | 0,02058 |
| Rv0005  | <i>gyrB</i>  | DNA GYRASE (SUBUNIT B) GYRB                                                                                                                          | 1,91 | 0,00161 |
| Rv0640  | <i>rplK</i>  | PROBABLE 50S RIBOSOMAL PROTEIN L11 RPLK                                                                                                              | 1,91 | 0,0073  |
| Rv0701  | <i>rplC</i>  | PROBABLE 50S RIBOSOMAL PROTEIN L3 RPLC                                                                                                               | 1,92 | 0,01161 |
| Rv0721  | <i>rpsE</i>  | PROBABLE 30S RIBOSOMAL PROTEIN S5 RPSE                                                                                                               | 1,92 | 0,0126  |
| Rv0668  | <i>rpoC</i>  | DNA-DIRECTED RNA POLYMERASE (BETA' CHAIN) RPOC                                                                                                       | 1,94 | 0,00353 |
| Rv0652  | <i>rplL</i>  | PROBABLE 50S RIBOSOMAL PROTEIN L7/L12 RPLL                                                                                                           | 1,96 | 0,01398 |
| Rv0710  | <i>rpsQ</i>  | PROBABLE 30S RIBOSOMAL PROTEIN S17 RPSQ                                                                                                              | 2,01 | 0,0402  |
| Rv0715  | <i>rplX</i>  | PROBABLE 50S RIBOSOMAL PROTEIN L24 RPLX                                                                                                              | 2,01 | 0,04266 |
| Rv0706  | <i>rplV</i>  | PROBABLE 50S RIBOSOMAL PROTEIN L22 RPLV                                                                                                              | 2,01 | 0,01763 |
| Rv0703  | <i>rplW</i>  | PROBABLE 50S RIBOSOMAL PROTEIN L23 RPLW                                                                                                              | 2,02 | 0,01458 |
| Rv0720  | <i>rplR</i>  | PROBABLE 50S RIBOSOMAL PROTEIN L18 RPLR                                                                                                              | 2,07 | 0,04529 |
| Rv1388  | <i>mihF</i>  | PUTATIVE INTEGRATION HOST FACTOR MIHF                                                                                                                | 2,09 | 0,00495 |
| Rv0634B | <i>rpmG2</i> | PROBABLE 50S RIBOSOMAL PROTEIN L33 RPMG2                                                                                                             | 2,12 | 0,01083 |
| Rv3459c | <i>rpsK</i>  | PROBABLE 30S RIBOSOMAL PROTEIN S11 RPSK                                                                                                              | 2,39 | 0,01416 |
| Rv0722  | <i>rpmD</i>  | PROBABLE 50S RIBOSOMAL PROTEIN L30 RPMD                                                                                                              | 2,40 | 0,0474  |
| Rv0055  | <i>rpsR1</i> | PROBABLE 30S RIBOSOMAL PROTEIN S18-1 RPSR1                                                                                                           | 2,41 | 0,00616 |
| Rv1643  | <i>rplT</i>  | PROBABLE 50S RIBOSOMAL PROTEIN L20 RPLT                                                                                                              | 2,51 | 0,00766 |
| Rv3460c | <i>rpsM</i>  | PROBABLE 30S RIBOSOMAL PROTEIN S13 RPSM                                                                                                              | 2,62 | 0,03019 |



|         |             |                                                                  |      |         |
|---------|-------------|------------------------------------------------------------------|------|---------|
| Rv3011c | <i>gatA</i> | PROBABLE GLUTAMYL-TRNA(GLN)<br>AMIDOTRANSFERASE (SUBUNIT A) GATA | 2,63 | 0,00902 |
| Rv2582  | <i>ppiB</i> | PROBABLE PEPTIDYL-PROLYL CIS-TRANS<br>ISOMERASE B PPIB           | 2,80 | 0,0124  |
| Rv0041  | <i>leuS</i> | PROBABLE LEUCYL-tRNA SYNTHETASE LEUS                             | 3,05 | 0,04344 |
| Rv3461c | <i>rpmJ</i> | PROBABLE 50S RIBOSOMAL PROTEIN L36 RPMJ                          | 3,22 | 0,00382 |
| Rv1390  | <i>rpoZ</i> | PROBABLE DNA-DIRECTED RNA POLYMERASE<br>RPOZ                     | 3,66 | 0,04035 |
| Rv2975A | <i>rpmB</i> | 50S RIBOSOMAL PROTEIN L28                                        | 3,87 | 0,01394 |

*Virulence, detoxification, adaptation*

|         |               |                                                               |      |         |
|---------|---------------|---------------------------------------------------------------|------|---------|
| Rv0440  | <i>hsp65</i>  | 60KDA CHAPERONINE                                             | 1,34 | 0,00177 |
| Rv3418c | <i>groS</i>   | 10KDA CHAPERONINE                                             | 1,41 | 0,00032 |
| Rv1908c | <i>katG</i>   | CATALASE PEROXYDASE                                           | 1,43 | 0,04957 |
| Rv3407  | <i>vapB47</i> | CONSERVED HYPOTHETICAL PROTEIN,<br>ANTITOXIN <i>vapB47</i>    | 1,51 | 0,02108 |
| Rv0350  | <i>dnaK</i>   | PROBABLE CHAPERONE PROTEIN DNAK                               | 1,53 | 0,01644 |
| Rv1932  | <i>tpx</i>    | PROBABLE THIOL PEROXIDASE TPX                                 | 1,60 | 0,0199  |
| Rv0352  | <i>dnaJ1</i>  | PROBABLE CHAPERONE PROTEIN DNAJ1                              | 1,84 | 0,0114  |
| Rv2373c | <i>dnaJ2</i>  | PROBABLE CHAPERONE PROTEIN DNAJ2                              | 1,85 | 0,00404 |
| Rv2299c | <i>htpG</i>   | PROBABLE CHAPERONE PROTEIN HTPG                               | 1,89 | 0,00146 |
| Rv0171  | <i>mce1C</i>  | MCE-FAMILY PROTEIN MCE1C                                      | 3,19 | 0,03676 |
| Rv2374c | <i>hrcA</i>   | PROBABLE HEAT SHOCK PROTEIN<br>TRANSCRIPTIONAL REPRESSOR HRCA | 4,35 | 0,01172 |
| Rv3134c |               | CONSERVED HYPOTHETICAL PROTEIN                                | 7,33 | 0,00171 |

*Cell wall and processes*

|         |              |                                                                      |      |         |
|---------|--------------|----------------------------------------------------------------------|------|---------|
| Rv2981c | <i>ddl</i>   | D ALANINE LIGASE                                                     | 1,35 | 0,04392 |
| Rv3888c |              | MEMBRANE PROTEIN                                                     | 1,39 | 0,04985 |
| Rv3867  | <i>espH</i>  | SECRETION PROTEIN ESPH                                               | 1,43 | 0,02712 |
| Rv3808c | <i>glfT2</i> | GLYCOSYL TRANSFERASE                                                 | 1,43 | 0,03764 |
| Rv2692  | <i>trkA</i>  | POTASSIUM TRANSPORTER TRKA                                           | 1,49 | 0,00206 |
| Rv3102c | <i>ftsE</i>  | CELL DIVISION ATP BINDING PROTEIN                                    | 1,49 | 0,00445 |
| Rv3614  | <i>espD</i>  | SECRETION PROTEIN                                                    | 1,51 | 0,01001 |
| Rv0284  |              | POSSIBLE CONSERVED MEMBRANE PROTEIN                                  | 1,57 | 0,03675 |
| Rv2158c | <i>murE</i>  | UDP-N-ACETYLMURANYL-TRIPETIDE<br>SYNTHETASE                          | 1,59 | 0,0056  |
| Rv3240c | <i>secA1</i> | PROBABLE PREPROTEIN TRANSLOCASE SECA1 1<br>SUBUNIT                   | 1,61 | 0,03592 |
| Rv2477c |              | PROBABLE MACROLIDE-TRANSPORT ATP-<br>BINDING PROTEIN ABC TRANSPORTER | 1,62 | 0,00147 |
| Rv2145c | <i>wag31</i> | CONSERVED HYPOTHETICAL PROTEIN WAG31                                 | 1,63 | 0,03999 |
| Rv0655  | <i>mkl</i>   | ABC TRANSPORTER                                                      | 1,80 | 0,00239 |
| Rv3917c | <i>parB</i>  | PROBABLE CHROMOSOME PARTITIONING<br>PROTEIN PARB                     | 1,82 | 0,04963 |

|                            |              |                                                                                                |       |         |
|----------------------------|--------------|------------------------------------------------------------------------------------------------|-------|---------|
| Rv1821                     | <i>secA2</i> | POSSIBLE PREPROTEIN TRANSLOCASE ATPase<br>SECA2                                                | 1,88  | 0,03665 |
| Rv0933                     | <i>pstB</i>  | PHOSPHATE-TRANSPORT ATP-BINDING PROTEIN<br>ABC TRANSPORTER PSTB                                | 1,89  | 0,01943 |
| Rv0820                     | <i>phoT</i>  | PHOSPHATE ABC TRANSPORTER ATP BINDING<br>PROTEIN PHOT                                          | 2,04  | 0,01701 |
| Rv3197                     |              | PROBABLE CONSERVED ATP-BINDING PROTEIN<br>ABC TRANSPORTER                                      | 2,22  | 0,01669 |
| Rv3781                     | <i>rfbE</i>  | PROBABLE O-ANTIGEN/LIPOPOLYSACCHARIDE<br>TRANSPORT ATP-BINDING PROTEIN ABC<br>TRANSPORTER RFBE | 2,57  | 0,02278 |
| Rv1488                     |              | POSSIBLE EXPORTED CONSERVED PROTEIN                                                            | 2,66  | 0,00645 |
| Rv2150c                    | <i>FtsZ</i>  | CELL DIVISION PROTEIN FTSZ                                                                     | 3,23  | 0,00688 |
| Rv0934                     | <i>pstS1</i> | PERIPLASMIC PHOSPHATE-BINDING<br>LIPOPROTEIN PSTS1                                             | 3,95  | 0,00033 |
| Rv0342                     | <i>iniA</i>  | ISONIAZID INDUCTIBLE GENE PROTEIN INIA                                                         | 4,39  | 0,00053 |
| Rv0341                     | <i>iniB</i>  | ISONIAZID INDUCTIBLE GENE PROTEIN INIB                                                         | 5,23  | 0,02819 |
| Rv3200c                    |              | POSSIBLE TRANSMEMBRANE CATION<br>TRANSPORTER                                                   | 8,50  | 0,01032 |
| Rv1269c                    |              | CONSERVED PROBABLE SECRETED PROTEIN                                                            | 28,74 | 0,02618 |
| <i>Regulatory proteins</i> |              |                                                                                                |       |         |
| Rv1626                     |              | TRANSCRIPTIONAL REGULATORY PROTEIN                                                             | 1,44  | 0,01665 |
| Rv3692                     | <i>moxR2</i> | PROBABLE METHANOL DEHYDROGENASE<br>TRANSCRIPTIONAL REGULATORY PROTEIN<br>MOXR2                 | 1,53  | 0,01628 |
| Rv0020c                    | <i>fhaA</i>  | CONSERVED HYPOTHETICAL PROTEIN WITH FHA<br>DOMAIN, FHAA                                        | 1,54  | 0,02354 |
| Rv0844c                    | <i>narL</i>  | POSSIBLE NITRATE/NITRITE RESPONSE<br>TRANSCRIPTIONAL REGULATORY PROTEIN<br>NARL                | 1,70  | 0,01024 |
| Rv0576                     |              | PROBABLE TRANSCRIPTIONAL REGULATORY<br>PROTEIN                                                 | 1,83  | 0,00924 |
| Rv1423                     | <i>whiA</i>  | PROBABLE TRANSCRIPTIONAL REGULATORY<br>PROTEIN WHIA                                            | 1,87  | 0,00189 |
| Rv3246c                    | <i>mtrA</i>  | TWO COMPONENT SENSORY TRANSDUCTION<br>TRANSCRIPTIONAL REGULATORY PROTEIN<br>MTRA               | 1,88  | 0,00378 |
| Rv2258c                    |              | POSSIBLE TRANSCRIPTIONAL REGULATORY<br>PROTEIN                                                 | 1,90  | 0,04391 |
| Rv3676                     | <i>crp</i>   | TRANSCRIPTIONAL REGULATORY PROTEIN CRP                                                         | 2,21  | 0,00683 |
| Rv0042c                    |              | POSSIBLE TRANSCRIPTIONAL REGULATORY<br>PROTEIN                                                 | 2,59  | 0,00348 |
| Rv3133c                    | <i>devR</i>  | TWO COMPONENT TRANSCRIPTIONAL<br>REGULATORY PROTEIN DEVR                                       | 3,04  | 0,01623 |
| Rv3583c                    |              | POSSIBLE TRANSCRIPTION FACTOR                                                                  | 3,13  | 0,02759 |
| Rv0757                     | <i>phoP</i>  | ALCALINE PHOSPHATASE PHOP                                                                      | 8,67  | 0,00106 |

*Conserved hypotheticals*

|         |                |                                                      |      |         |
|---------|----------------|------------------------------------------------------|------|---------|
| Rv0074  |                | CONSERVED HYPOTHETICAL PROTEIN                       | 0,34 | 0,03426 |
| Rv0678  |                | CONSERVED HYPOTHETICAL PROTEIN                       | 0,36 | 0,00075 |
| Rv1875  |                | UNKNOWN PROTEIN                                      | 1,33 | 0,02118 |
| Rv1261c |                | CONSERVED HYPOTHETICAL PROTEIN                       | 1,44 | 0,0294  |
| Rv3075c |                | HYPOTHETICAL PROTEIN                                 | 1,46 | 0,04643 |
| Rv3683  |                | CONSERVED HYPOTHETICAL PROTEIN                       | 1,51 | 0,02673 |
| Rv0787A |                | CONSERVED HYPOTHETICAL PROTEIN                       | 1,52 | 0,00639 |
| Rv0831c |                | CONSERVED HYPOTHETICAL PROTEIN                       | 1,55 | 0,01236 |
| Rv1159A |                | HYPOTHETICAL PROTEIN                                 | 1,57 | 0,03004 |
| Rv1636  | <i>TB 15.3</i> | IRON-REGULATED CONSERVED HYPOTHETICAL PROTEIN TB15.3 | 1,59 | 0,01655 |
| Rv2061c |                | CONSERVED HYPOTHETICAL PROTEIN                       | 1,60 | 0,01521 |
| Rv0854  |                | CONSERVED HYPOTHETICAL PROTEIN                       | 1,62 | 0,04899 |
| Rv2172c |                | CONSERVED HYPOTHETICAL PROTEIN                       | 1,62 | 0,00609 |
| Rv2778c |                | CONSERVED HYPOTHETICAL PROTEIN                       | 1,62 | 0,0212  |
| Rv3046c |                | CONSERVED HYPOTHETICAL PROTEIN                       | 1,66 | 0,03544 |
| Rv2699c |                | CONSERVED HYPOTHETICAL PROTEIN                       | 1,69 | 0,00323 |
| Rv2054  |                | CONSERVED HYPOTHETICAL PROTEIN                       | 1,74 | 0,00184 |
| Rv0333  |                | HYPOTHETICAL PROTEIN                                 | 1,74 | 0,01082 |
| Rv0466  |                | CONSERVED HYPOTHETICAL PROTEIN                       | 1,74 | 0,00411 |
| Rv2228c |                | CONSERVED HYPOTHETICAL PROTEIN                       | 1,75 | 0,03292 |
| Rv2868c | <i>gcpE</i>    | PROBABLE GCPE PROTEIN                                | 1,78 | 0,00106 |
| Rv2074  |                | POSSIBLE PYRIDOXAMINE 5' PHOSPHATE OXYDASE           | 1,81 | 0,0426  |
| Rv0123  |                | HYPOTHETICAL PROTEIN                                 | 1,81 | 0,01847 |
| Rv3718c |                | CONSERVED HYPOTHETICAL PROTEIN                       | 1,85 | 0,03225 |
| Rv2632c |                | CONSERVED HYPOTHETICAL PROTEIN                       | 1,92 | 0,00859 |
| Rv2744c | <i>35kd_ag</i> | CONSERVED 35 KDA ALANINE RICH PROTEIN                | 1,92 | 0,00905 |
| Rv3600c |                | CONSERVED HYPOTHETICAL PROTEIN                       | 1,93 | 0,00904 |
| Rv0898c |                | CONSERVED HYPOTHETICAL PROTEIN                       | 1,94 | 0,01905 |
| Rv3734c | <i>Tgs2</i>    | PUTATIVE TRIACYLGLYCEROL SYNTHASE TGS2               | 1,95 | 0,03412 |
| Rv3597c | <i>Lsr2</i>    | PROBABLE IRON-REGULATED LSR2 PROTEIN PRECURSOR       | 1,95 | 8,6E-05 |
| Rv3920c |                | HYPOTHETICAL PROTEIN SIMILAR TO JAG PROTEIN          | 2,03 | 0,04132 |
| Rv2114  |                | HYPOTHETICAL PROTEIN                                 | 2,06 | 0,0035  |
| Rv1021  |                | CONSERVED HYPOTHETICAL PROTEIN                       | 2,07 | 0,0009  |
| Rv2908c |                | CONSERVED HYPOTHETICAL PROTEIN                       | 2,08 | 0,00542 |
| Rv3790  | <i>dprE1</i>   | DECAPRENYLPHOSPHORYL-BET-D-RIBOSE OXYDASE            | 2,13 | 0,04643 |
| Rv0991c |                | CONSERVED HYPOTHETICAL SERINE RICH PROTEIN           | 2,20 | 0,00012 |
| Rv0360c |                | CONSERVED HYPOTHETICAL PROTEIN                       | 2,32 | 0,0254  |
| Rv1996  |                | CONSERVED HYPOTHETICAL PROTEIN                       | 2,40 | 0,01274 |

|         |               |                                         |       |         |
|---------|---------------|-----------------------------------------|-------|---------|
| Rv2230c |               | CONSERVED HYPOTHETICAL PROTEIN          | 2,43  | 0,01759 |
| Rv3489  |               | HYPOTHETICAL PROTEIN                    | 2,55  | 0,00459 |
| Rv2426c |               | CONSERVED HYPOTHETICAL PROTEIN          | 2,56  | 0,00361 |
| Rv1770  |               | CONSERVED HYPOTHETICAL PROTEIN          | 2,57  | 0,00037 |
| Rv0530  |               | CONSERVED HYPOTHETICAL PROTEIN          | 2,63  | 0,01837 |
| Rv3788  |               | HYPOTHETICAL PROTEIN                    | 2,69  | 0,04121 |
| Rv3196A |               | HYPOTHETICAL PROTEIN                    | 2,71  | 0,02928 |
| Rv3865  | <i>espF</i>   | ESX-1-SECRETION-ASSOCIATED PROTEIN ESPF | 2,99  | 0,00184 |
| Rv3311  |               | CONSERVED HYPOTHETICAL PROTEIN          | 3,14  | 0,00191 |
| Rv0079  |               | HYPOTHETICAL PROTEIN                    | 3,54  | 0,0057  |
| Rv2005c |               | CONSERVED HYPOTHETICAL PROTEIN          | 3,65  | 0,00121 |
| Rv2030c |               | CONSERVED HYPOTHETICAL PROTEIN          | 3,81  | 0,00845 |
| Rv2629  |               | CONSERVED HYPOTHETICAL PROTEIN          | 4,21  | 0,00349 |
| Rv0108c |               | HYPOTHETICAL PROTEIN                    | 4,94  | 1,9E-05 |
| Rv2411c |               | CONSERVED HYPOTHETICAL PROTEIN          | 4,96  | 0,02186 |
| Rv2623  |               | CONSERVED HYPOTHETICAL PROTEIN TB31.7   | 5,01  | 0,01997 |
| Rv2032  | <i>acg</i>    | CONSERVED HYPOTHETICAL PROTEIN ACG      | 5,31  | 0,02419 |
| Rv3871  | <i>eccCb1</i> | ESX CONSERVED COMPONENT ECCCB1          | 6,39  | 0,00047 |
| Rv1738  |               | CONSERVED HYPOTHETICAL PROTEIN          | 20,06 | 0,00015 |

### Proteins down- and upexpressed after a 24 h simvastatin treatment

| ORF                                            | Gene name    | Gene product                                                             | Fold change | p-values |
|------------------------------------------------|--------------|--------------------------------------------------------------------------|-------------|----------|
| <i>Intermediary metabolism and respiration</i> |              |                                                                          |             |          |
| Rv0560c                                        |              | POSSIBLE BENZOQUINONE METHYLTRANSFERASE                                  | 0,04        | 0,02592  |
| Rv0077c                                        |              | PROBABLE OXIDOREDUCTASE                                                  | 0,05        | 2,8E-06  |
| Rv2858c                                        | <i>aldC</i>  | PROBABLE ALDEHYDE DEHYDROGENASE ALDC                                     | 0,25        | 0,02522  |
| Rv3778c                                        |              | POSSIBLE AMINOTRANSFERASE                                                | 0,32        | 0,02681  |
| Rv1652                                         | <i>argC</i>  | PROBABLE N-ACETL-GAMMA-GLUTAMYL-PHOSPHATE REDUCTASE ARGC                 | 0,36        | 0,04607  |
| Rv0189c                                        | <i>ilvD</i>  | PROBABLE DIHYDROXY-ACID DEHYDRATASE ILVD                                 | 0,38        | 0,04197  |
| Rv2439c                                        | <i>proB</i>  | PROBABLE GLUTAMATE 5-KINASE PROTEIN PROB                                 | 0,38        | 0,01857  |
| Rv1380                                         | <i>pyrB</i>  | PROBABLE ASPARTATE CARBAMOYLTRANSFERASE PYRB                             | 0,43        | 0,02299  |
| Rv0803                                         | <i>purL</i>  | PHOSPHORIBOSYLFORMYLGLYCINAMIDINE SYNTHASE II PURL                       | 0,50        | 0,02455  |
| Rv2161c                                        |              | CONSERVED HYPOTHETICAL PROTEIN                                           | 0,51        | 0,00063  |
| Rv3042c                                        | <i>serB2</i> | PROBABLE PHOSPHOSERINE PHOSPHATASE SERB2                                 | 0,53        | 0,04512  |
| Rv3275c                                        | <i>purE</i>  | PROBABLE PHOSPHORIBOSYLAMINOIMIDAZOLE CARBOXYLASE CATALYTIC SUBUNIT PURE | 0,57        | 0,02338  |
| Rv1612                                         | <i>trpB</i>  | PROBABLE TRYPTOPHAN SYNTHASE, BETA SUBUNIT TRPB                          | 0,60        | 0,03615  |

|         |             |                                                                      |      |         |
|---------|-------------|----------------------------------------------------------------------|------|---------|
| Rv1133c | <i>metE</i> | 5-METHYLTETRAHYDROPTEROYLTRIGLUTAMATE-HOMOCYSTEINE METHYLTRANSFERASE | 0,67 | 0,04245 |
| Rv1144  |             | 3 HYDROXY-2-METHYLBUTYRYL-COA DEHYDROGENASE                          | 0,68 | 0,03472 |
| Rv0458  |             | ALDEHYDE DEHYDROGENASE                                               | 0,71 | 0,02484 |
| Rv0730  |             | GCN-5-RELATED N-ACETYLTRANSFERASE                                    | 0,75 | 0,04879 |
| Rv3117  |             | SULFURTRANSFERASE                                                    | 0,77 | 0,04603 |
| Rv1596  | <i>nadC</i> | NICOTINATE NUCLEOTIDE PYROPHOSPHORYLASE                              | 0,83 | 0,03576 |
| Rv3161c |             | POSSIBLE DIOXYGENASE                                                 | 2,91 | 0,00441 |
| Rv0247c |             | PROBABLE SUCCINATE DEHYDROGENASE                                     | 3,93 | 0,02276 |
| Rv3432c | <i>gadB</i> | PROBABLE GLUTAMATE DECARBOXYLASE GADB                                | 4,01 | 0,00902 |
| Rv1383  | <i>carA</i> | PROBABLE CARBAMOYL-PHOSPHATE SYNTHASE SMALL CHAIN CARA               | 4,30 | 0,01159 |

#### *Lipid metabolism*

|         |               |                                                     |      |         |
|---------|---------------|-----------------------------------------------------|------|---------|
| Rv0873  | <i>fadE10</i> | PROBABLE ACYL-CoA DEHYDROGENASE FADE10              | 0,27 | 0,02388 |
| Rv0632c | <i>echA3</i>  | PROBABLE ENOYL-CoA HYDRATASE ECHA3                  | 0,46 | 0,00161 |
| Rv3774  | <i>echA21</i> | POSSIBLE ENOYL-CoA HYDRATASE ECHA21                 | 0,51 | 0,02639 |
| Rv0469  | <i>umaA</i>   | POSSIBLE MYCOLIC ACID SYNTHASE UMAA                 | 0,54 | 0,00531 |
| Rv2002  | <i>fabG3</i>  | POSSIBLE 20-BETA-HYDROXYSTEROID DEHYDROGENASE FABG3 | 0,58 | 0,02601 |
| Rv0860  | <i>fadB</i>   | PROBABLE FATTY OXIDATION PROTEIN FADB               | 0,63 | 0,02238 |
| Rv0905  | <i>echA6</i>  | ENOYL-COA-HYDRATASE                                 | 0,80 | 0,04345 |
| Rv1543  |               | OXYDOREDUCTASE                                      | 1,37 | 0,01025 |
| Rv1886c | <i>fbpB</i>   | SECRETED ANTIGEN 85-B FBPB                          | 3,44 | 0,00205 |

#### *Information pathways*

|         |             |                                                     |      |         |
|---------|-------------|-----------------------------------------------------|------|---------|
| Rv0670  | <i>end</i>  | PROBABLE ENDONUCLEASE IV END                        | 0,25 | 0,00117 |
| Rv3051c | <i>nrdE</i> | RIBONUCLEOSIDE-DIPHOSPHATE REDUCTASE NRDE           | 0,33 | 0,03722 |
| Rv1340  | <i>rphA</i> | PROBABLE RIBONUCLEASE RPHA                          | 0,56 | 0,00372 |
| Rv0703  | <i>rplW</i> | 50S RIBOSOMAL PROTEIN L23                           | 1,42 | 0,01976 |
| Rv3461c | <i>rpmJ</i> | 50S RIBOSOMAL PROTEIN L36                           | 1,44 | 0,01011 |
| Rv3834c | <i>serS</i> | SERYL-TRNA SYNTHETASE SERS                          | 2,00 | 0,04965 |
| Rv2582  | <i>ppiB</i> | PROBABLE PEPTIDYL-PROLYL CIS-TRANS ISOMERASE B PPIB | 2,15 | 0,0274  |

#### *Virulence, detoxification, adaptation*

|         |               |                                            |      |         |
|---------|---------------|--------------------------------------------|------|---------|
| Rv2493  | <i>vapB38</i> | POSSIBLE ANTITOXIN VAPB38                  | 0,11 | 0,00175 |
| Rv1908c | <i>katG</i>   | CATALASE-PEROXIDASE-PEROXYNITRITASE T KATG | 0,59 | 0,02463 |
| Rv2063  | <i>mazE7</i>  | ANTITOXIN MAZE7                            | 1,92 | 0,04555 |

#### *Cell wall and processes*

|        |  |                    |      |         |
|--------|--|--------------------|------|---------|
| Rv1987 |  | POSSIBLE CHITINASE | 0,31 | 0,02895 |
|--------|--|--------------------|------|---------|

|                                |               |                                                           |      |         |
|--------------------------------|---------------|-----------------------------------------------------------|------|---------|
| Rv1038c                        | <i>esxJ</i>   | ESAT-6 LIKE PROTEIN ESXJ                                  | 0,35 | 0,00851 |
| Rv3809c                        | <i>glf</i>    | UDP-GALACTOPYRANOSE MUTASE                                | 0,39 | 0,01595 |
| Rv3874                         | <i>esxB</i>   | 10 KDA CULTURE FILTRATE ANTIGEN ESXB                      | 0,62 | 0,01943 |
| <i>Regulatory proteins</i>     |               |                                                           |      |         |
| Rv3143                         |               | PROBABLE RESPONSE REGULATOR                               | 0,26 | 0,01309 |
| Rv1267c                        | <i>embR</i>   | PROBABLE TRANSCRIPTIONAL REGULATORY PROTEIN EMBR          | 0,27 | 0,03298 |
| Rv0015c                        | <i>pknA</i>   | TRANSMEMBRANE SERINE/THREONINE-PROTEIN KINASE A PKNA      | 0,29 | 0,03018 |
| Rv0903c                        | <i>prxA</i>   | TRANSCRIPTIONAL REGULATOR                                 | 0,68 | 0,02181 |
| <i>Conserved hypotheticals</i> |               |                                                           |      |         |
| Rv1637c                        |               | CONSERVED HYPOTHETICAL PROTEIN                            | 0,12 | 0,03102 |
| Rv1769                         |               | CONSERVED HYPOTHETICAL PROTEIN                            | 0,25 | 0,0497  |
| Rv3547                         |               | CONSERVED HYPOTHETICAL PROTEIN                            | 0,36 | 0,02813 |
| Rv0074                         |               | CONSERVED HYPOTHETICAL PROTEIN                            | 0,37 | 0,02476 |
| Rv1893                         |               | CONSERVED HYPOTHETICAL PROTEIN                            | 0,44 | 0,00018 |
| Rv2302                         |               | CONSERVED HYPOTHETICAL PROTEIN                            | 0,47 | 0,01501 |
| Rv0577                         | <i>TB27.3</i> | CONSERVED HYPOTHETICAL PROTEIN                            | 0,52 | 0,0377  |
| Rv3678c                        |               | CONSERVED HYPOTHETICAL PROTEIN                            | 0,52 | 0,02992 |
| Rv0678                         | <i>mmpR5</i>  | CONSERVED HYPOTHETICAL PROTEIN                            | 0,52 | 0,00238 |
| Rv2475c                        |               | CONSERVED HYPOTHETICAL PROTEIN                            | 0,58 | 0,04676 |
| Rv2159c                        |               | CONSERVED HYPOTHETICAL PROTEIN                            | 0,61 | 0,01673 |
| Rv0145                         |               | POSSIBLE S-ADENOSYLMETHIONINE-DEPENDENT METHYLTRANSFERASE | 0,62 | 0,02184 |
| Rv1827                         | <i>garA</i>   | CONSERVED HYPOTHETICAL PROTEIN WITH FHA DOMAIN            | 0,64 | 0,00959 |
| Rv1498A                        |               | CONSERVED HYPOTHETICAL PROTEIN                            | 0,67 | 0,02886 |
| Rv3046c                        |               | CONSERVED HYPOTHETICAL PROTEIN                            | 0,68 | 0,04952 |
| Rv3600c                        | <i>coaX</i>   | TYPE III PANTOTHENATE KINASE                              | 0,69 | 0,00194 |
| Rv1919c                        |               | CONSERVED HYPOTHETICAL PROTEIN                            | 0,71 | 0,01704 |
| Rv3208A                        | <i>TTB9.4</i> | CONSERVED PROTEIN TB9.4                                   | 0,75 | 0,04714 |
| Rv1261c                        |               | NITROREDUCTASE                                            | 0,82 | 0,02658 |
| Rv2821c                        | <i>cmr4</i>   | CRISPR ASSOCIATED PROTEIN                                 | 1,25 | 0,0415  |
| Rv1894c                        |               | MONOOXYGENASE                                             | 1,46 | 0,03288 |
| Rv1021                         |               | CONSERVED HYPOTHETICAL PROTEIN                            | 1,62 | 0,00016 |
| Rv2426c                        |               | CONSERVED HYPOTHETICAL PROTEIN                            | 1,97 | 0,03874 |
| Rv1738                         |               | CONSERVED HYPOTHETICAL PROTEIN                            | 2,30 | 0,04828 |
